# Supplementary material for: Synthesis and noncovalent polymerization of self-complementary hydrogen-bonding supramolecular synthons: N,N′-disubstituted 4,6-diamino-pyrimidin-2(1H)-ones
Source: Royal Society of Chemistry journal article supplement (doi:10.1039/b401132e), 2004-01-01
Supplement: b401132e.doc [file b401132e.doc]

# *Electronic Supplementary Information for:*

**Facile synthesis and noncovalent polymerization of self-complementary hydrogen-bonding supramolecular synthons: *N,N’*-disubstituted 4,6-diamino-pyrimidin-2(1*H*)-ones**

# Shiki Yagai,* Tomoyuki Iwashima, Takashi Karatsu and Akihide Kitamura

Department of Materials Technology, Faculty of Engineering, Chiba University, 1-33 Yayoi-cho, Inage-ku, Chiba 263-8522, Japan

# General procedure for the synthesis of *N*,*N*’-disubstituted 4,6-diaminopyrimidin-2(1*H*)-ones

To a solution of sodium salt of 4,6-dichloropyrimidin-2-one and 4 equiv. of *N*,*N*-diisopropylethylamine in dioxane, 4 equiv. of appropriate aromatic or aliphatic amine was added and the mixture was heated for 80 ºC (for **2**−**5**,) or 105 ºC (for **1** and **6**−**8**) overnight under N2. The reaction mixture was cooled to room temperature to give precipitates. The precipitates were filtered and washed with water. The precipitates were dried to give desired products.

4,6-di(phenylamino)pyrimidin-2(1*H*)-one **1**

1H NMR (CDCl3 with TFA) ** = 7.15–7.38 (m, 10H), 5.27 (s, 1H). MS (FAB) found: *m*/*z* 279. Calcd for C16H15N4O: (M+H)+, 279. Anal found: C, 69.05; H, 5.07; N, 20.13. Calcd for C16H15N4O: C, 68.88; H, 5.31; N, 20.16.

4,6-di(benzylamino)pyrimidin-2(1*H*)-one **2**

1H NMR (CDCl3 with TFA) ** = 7.10–7.33 (m, 10H), 5.99 (s, 1H), 4.34, 4.33 (each 2H, s), 3.96 (4H, t, *J* = 6 Hz), 3.85 (8H, t, *J* = 6 Hz), 1.74 (12H, m), 1.42 (12H, m), 1.30 (96H, m), 0.88 (18H, m, *J* = 6 Hz). MS (FAB) found: *m*/*z* 307. Calcd for C18H19N4O: (M+H)+, 307. Anal found: C, 70.00; H, 5.99; N, 18.22. Calcd for C18H19N4O: C, 70.57; H, 5.92; N, 18.29.

4,6-di(dodecylamino)pyrimidin-2(1*H*)-one **3**

1H NMR (CDCl3 with TFA) ** = 4.69 (1H, s), 3.14–3.26 (m, 4H), 1.60–1.66 (m, 4H), 1.20–1.40 (m, 36H), 0.88 (t, *J* = 7 Hz, 6H). MS (FAB) found: *m*/*z* 464. Calcd for C28H55N4O: (M+H)+, 464. Anal found: C, 72.67; H, 11.76; N, 12.11 Calcd for C28H55N4O: C, 72.67; H, 11.76; N, 12.11.

4,6-di(octadecylamino)pyrimidin-2(1*H*)-one **4**

1H NMR (CDCl3 with TFA) ** = 4.69 (1H, s), 3.20–3.22 (m, 4H), 1.62–1.66 (m, 4H), 1.23–1.31 (m, 60H), 0.88 (t, *J* = 7 Hz, 6H). MS (FAB) found: *m*/*z* 632. Calcd for C40H79N4O: (M+H)+, 632. Anal found: C, 76.13; H, 12.46; N, 8.88. Calcd for C40H79N4O: C, 76.27; H, 12.76; N, 9.03.

4,6-di[(2-ethylhexyl)amino]pyrimidin-2(1*H*)-one **5**

1H NMR (CDCl3 with TFA) ** = 4.72 (s, 1H), 3.14 (4H, t, *J* = 6 Hz). 1.60 (m, 2H), 1.27–1.41 (m, 16H), 0.87–0.91 (m, 12H). MS (FAB) found: *m*/*z* 350. Calcd for C20H38N4O: M+, 350. Anal found: C, 68.93; H, 11.30; N, 16.15. Calcd for C20H38N4O: C, 68.53; H, 10.93; N, 15.98.

4,6-di[(4-dodecyloxyphenyl)amino]pyrimidin-2(1*H*)-one **6**

1H NMR (CDCl3 with TFA) ** = 7.06 (d, *J* = 9 Hz, 4H), 6.86 (d, *J* = 9 Hz, 4H), 5.07 (s, 1H), 3.92 (t, *J* = 7 Hz, 4H), 1.77 (m, 4H), 1.27–1.43 (m, 36H), 0.88 (t, *J* = 7 Hz, 6H). MS (FAB) found: *m*/*z* 648. Calcd for C40H162N4O3: (M+H)+, 648. Anal found: C, 74.26; H, 9.66; N, 8.64. Calcd for C40H162N4O3: C, 74.04; H, 9.82; N, 8.66.

4,6-bis[(3,4-didodecyloxyphenyl)amino]pyrimidin-2(1*H*)-one **7**

1H NMR (CDCl3 with TFA) ** = 6.84–6.86 (m, 2H), 6.70–6.73 (m, 4H), 5.23 (1H, s), 3.96 (4H, t, *J* = 7 Hz), 3.90 (4H, t, *J* = 7 Hz), 1.80 (8H, m), 1.45 (8H, m), 1.30 (72H, m), 0.88 (12H, t, *J* = 7 Hz). MS (FAB) found: *m*/*z* 1016. Calcd for C64H110N4O5: (M+H)+, 1016. Anal found: C, 75.42; H, 11.08; N, 5.63. Calcd for C64H110N4O5: C, 75.69; H, 10.92; N, 5.52.

4,6-bis[(3,4,5-tridodecyloxyphenyl)amino]pyrimidin-2(1*H*)-one **8**

1H NMR (CDCl3 with TFA) ** = 6.37 (4H, s), 5.38 (1H, br-s), 3.96 (4H, t, *J* = 6 Hz), 3.85 (8H, t, *J* = 6 Hz), 1.74 (12H, m), 1.42 (12H, m), 1.30 (108H, m), 0.88 (18H, t, *J* = 6 Hz). MS (FAB) found: *m*/*z* 1384. Calcd for C88H158N4O7: M+, 1384. Anal. found: C, 76.29; H, 11.18; N, 3.83. Calcd for C88H158N4O7: C, 76.36; H, 11.51; N, 4.05.

**FAB-MS spectra of pyrimidinone 1, 2 and 3 in CHCl3 with small amount of TFA.**

***
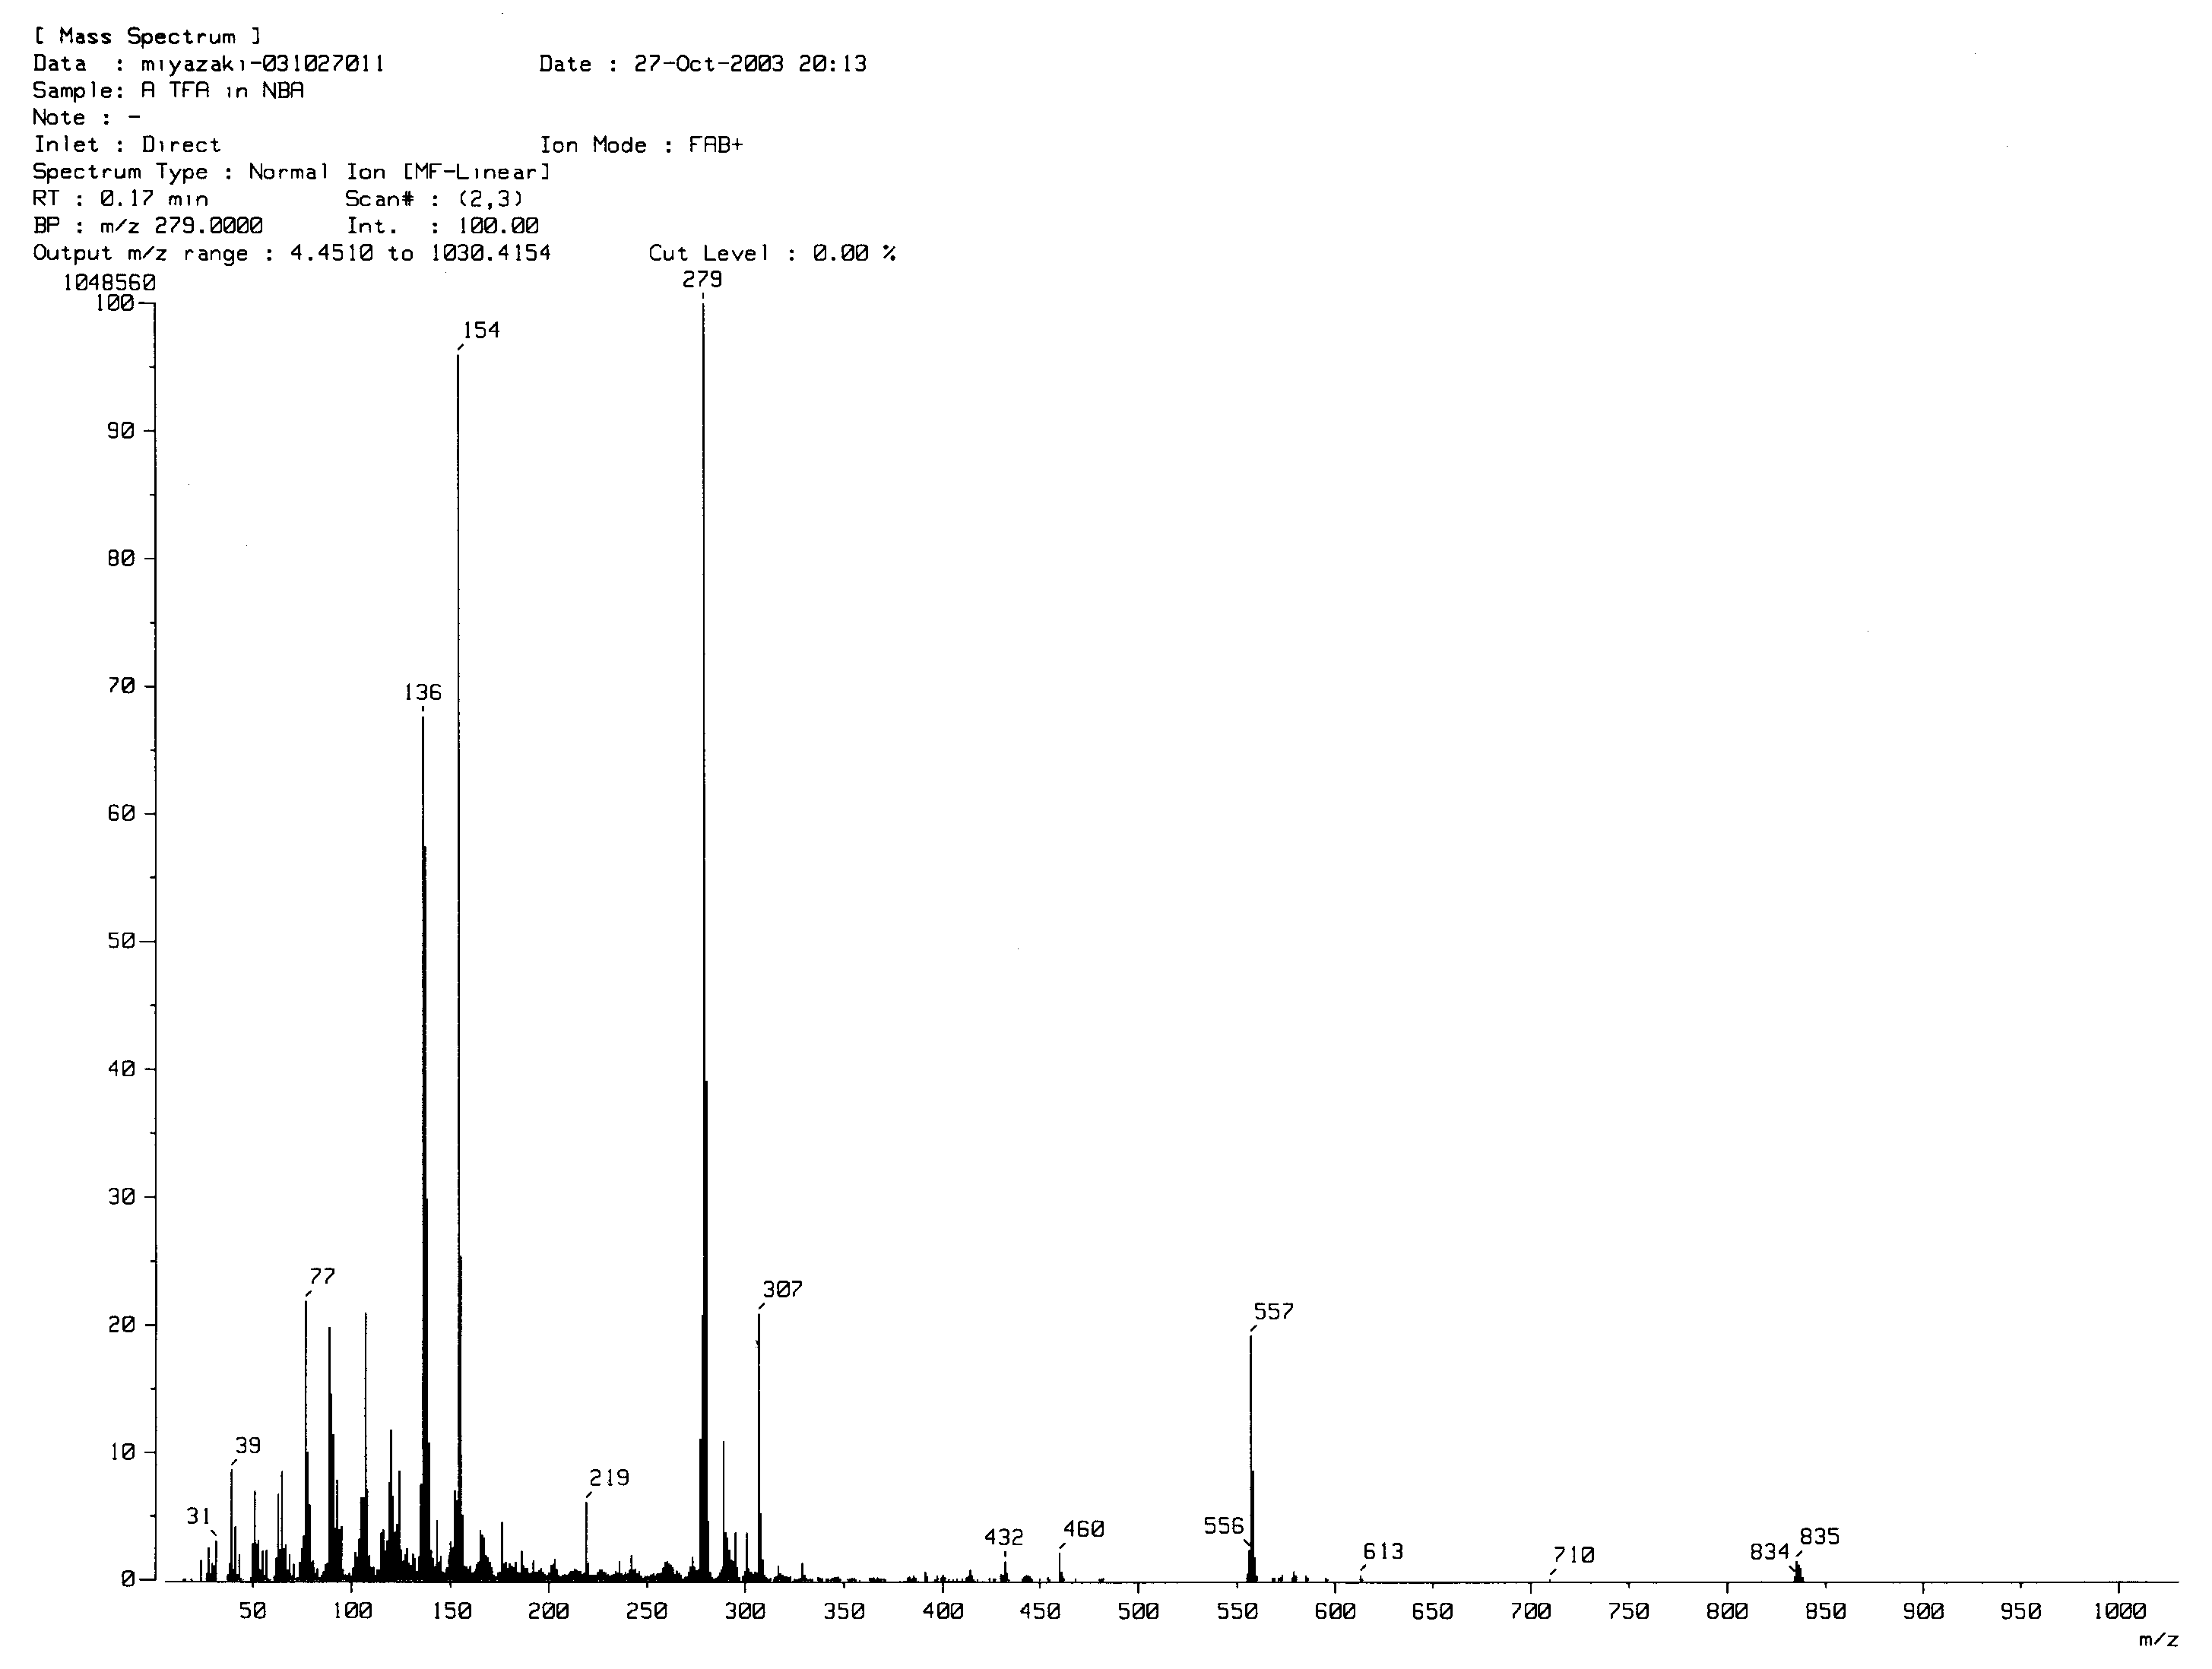

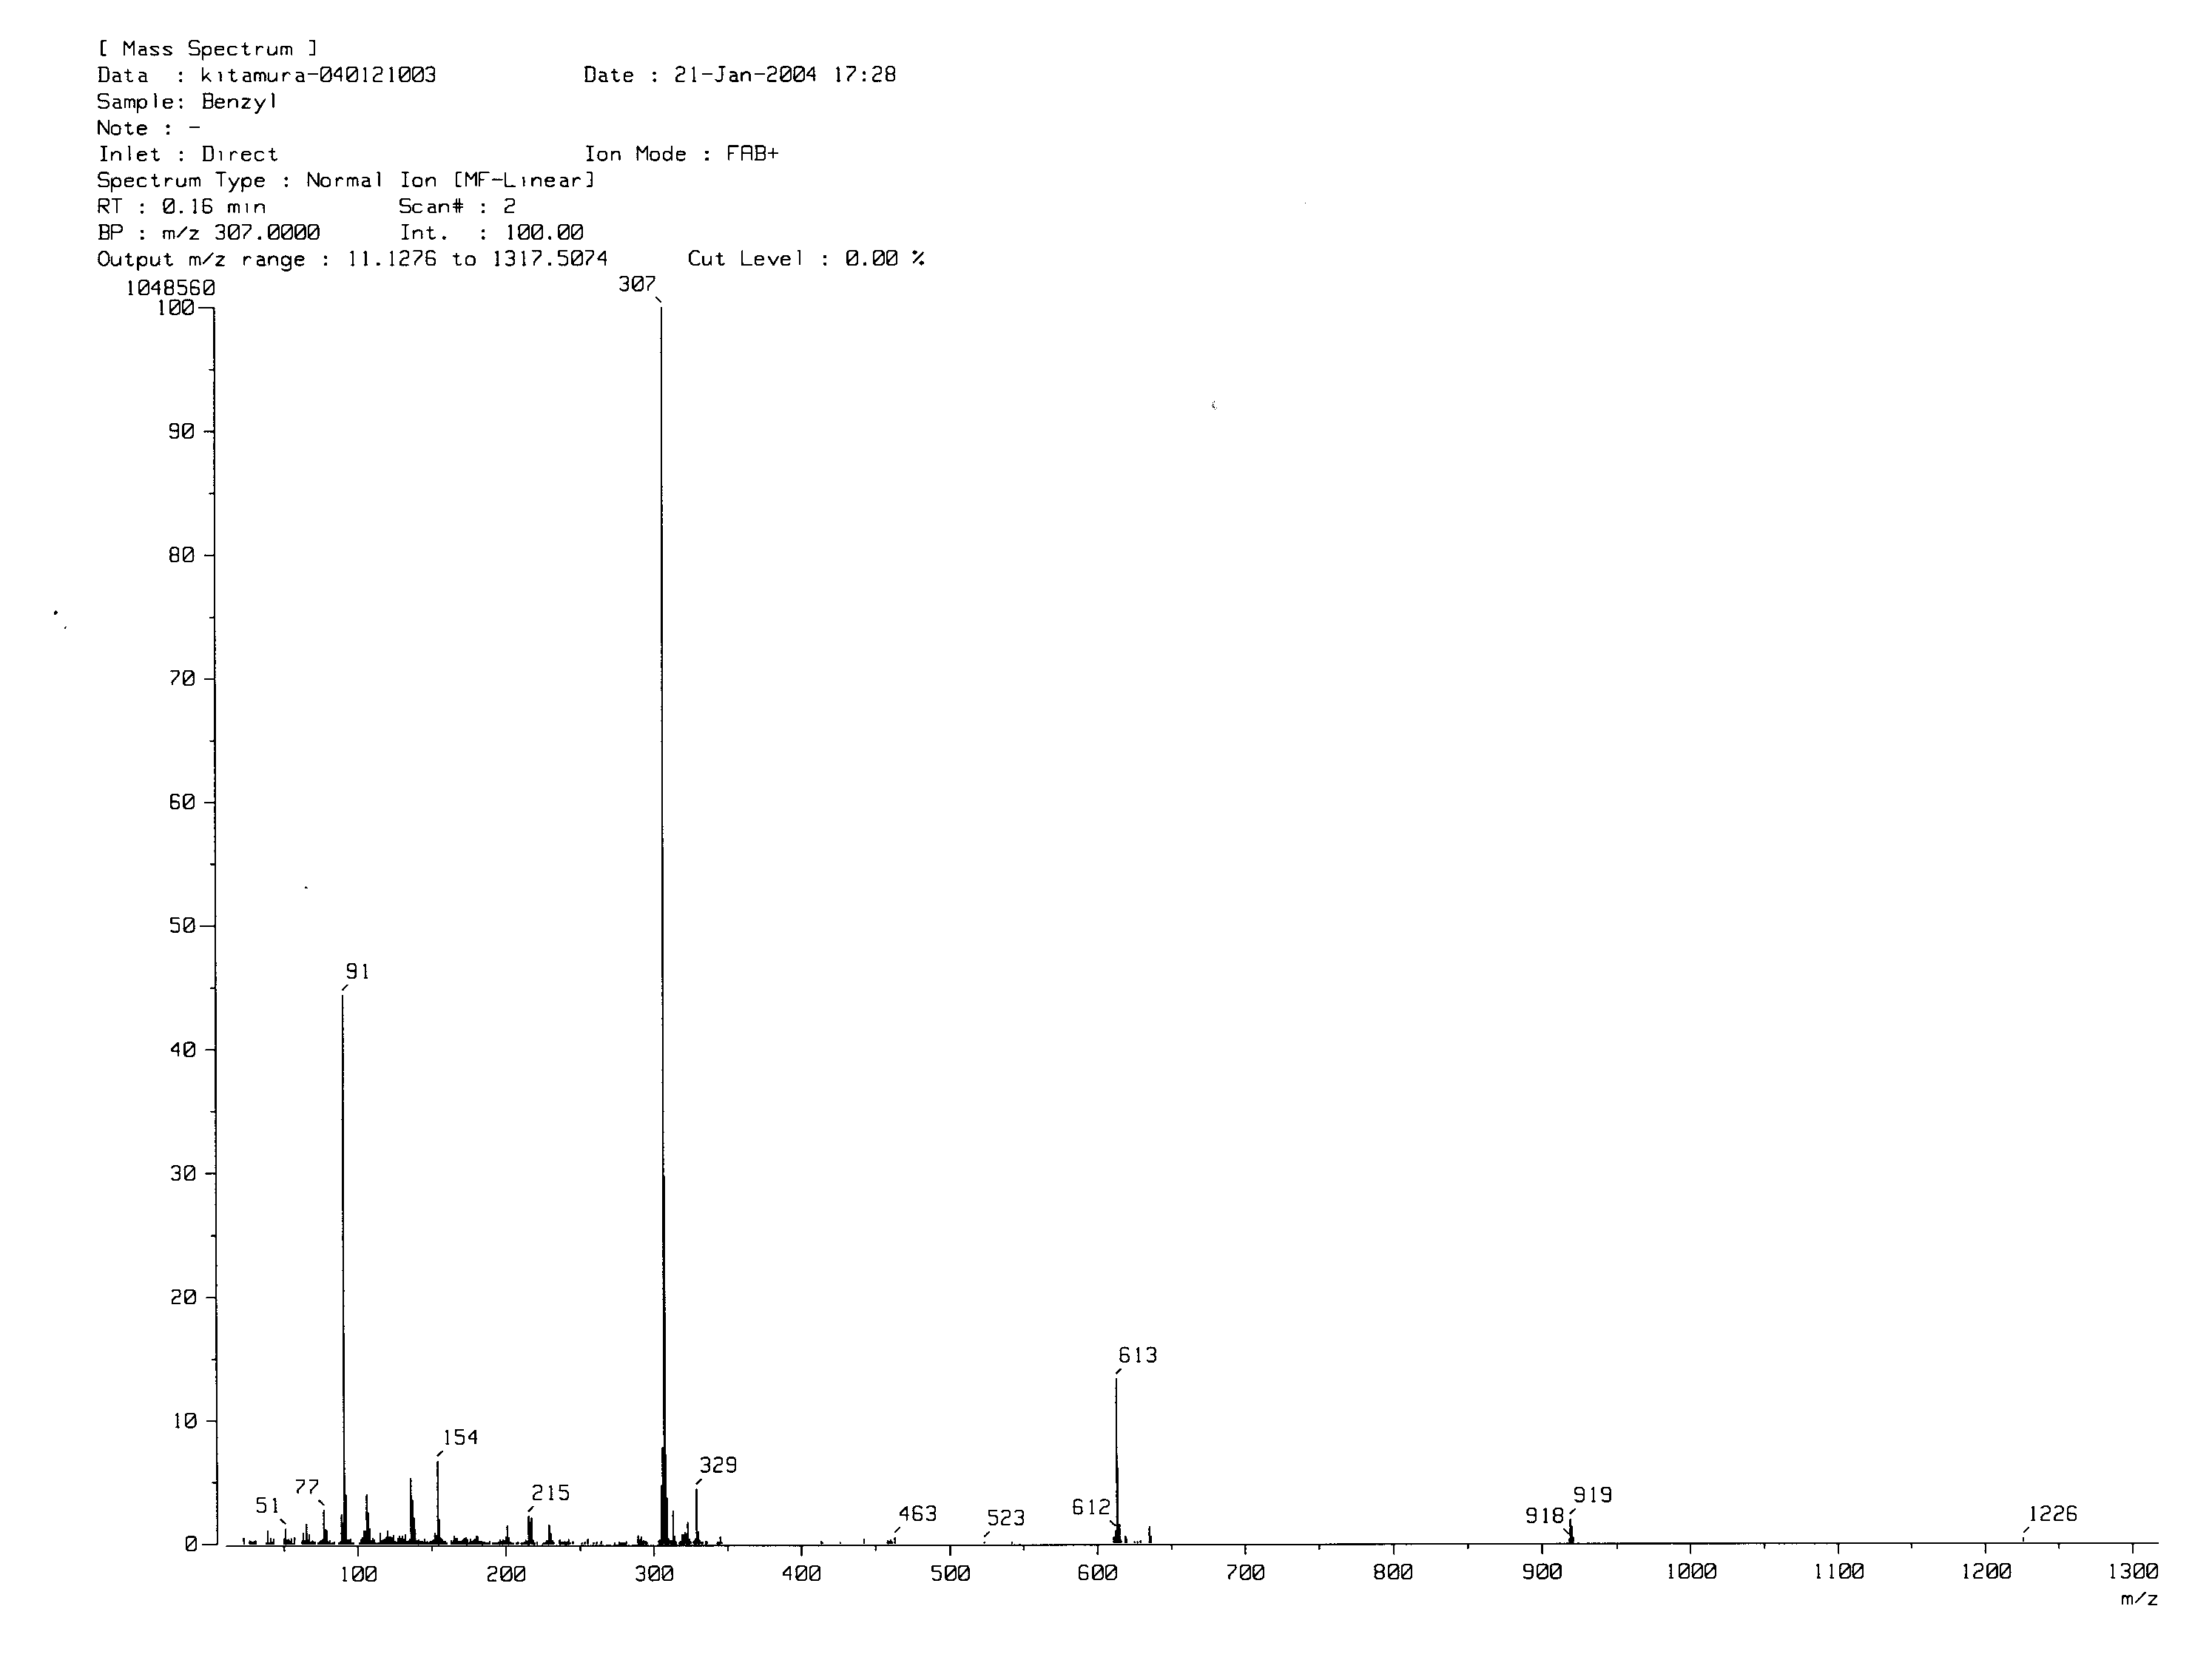
***

**1**, C16H14N4O, 278

**2**, C18H18N4O, 306

MH+

M2H+

M3H+

MH+

M2H+

M3H+

M4H+

***
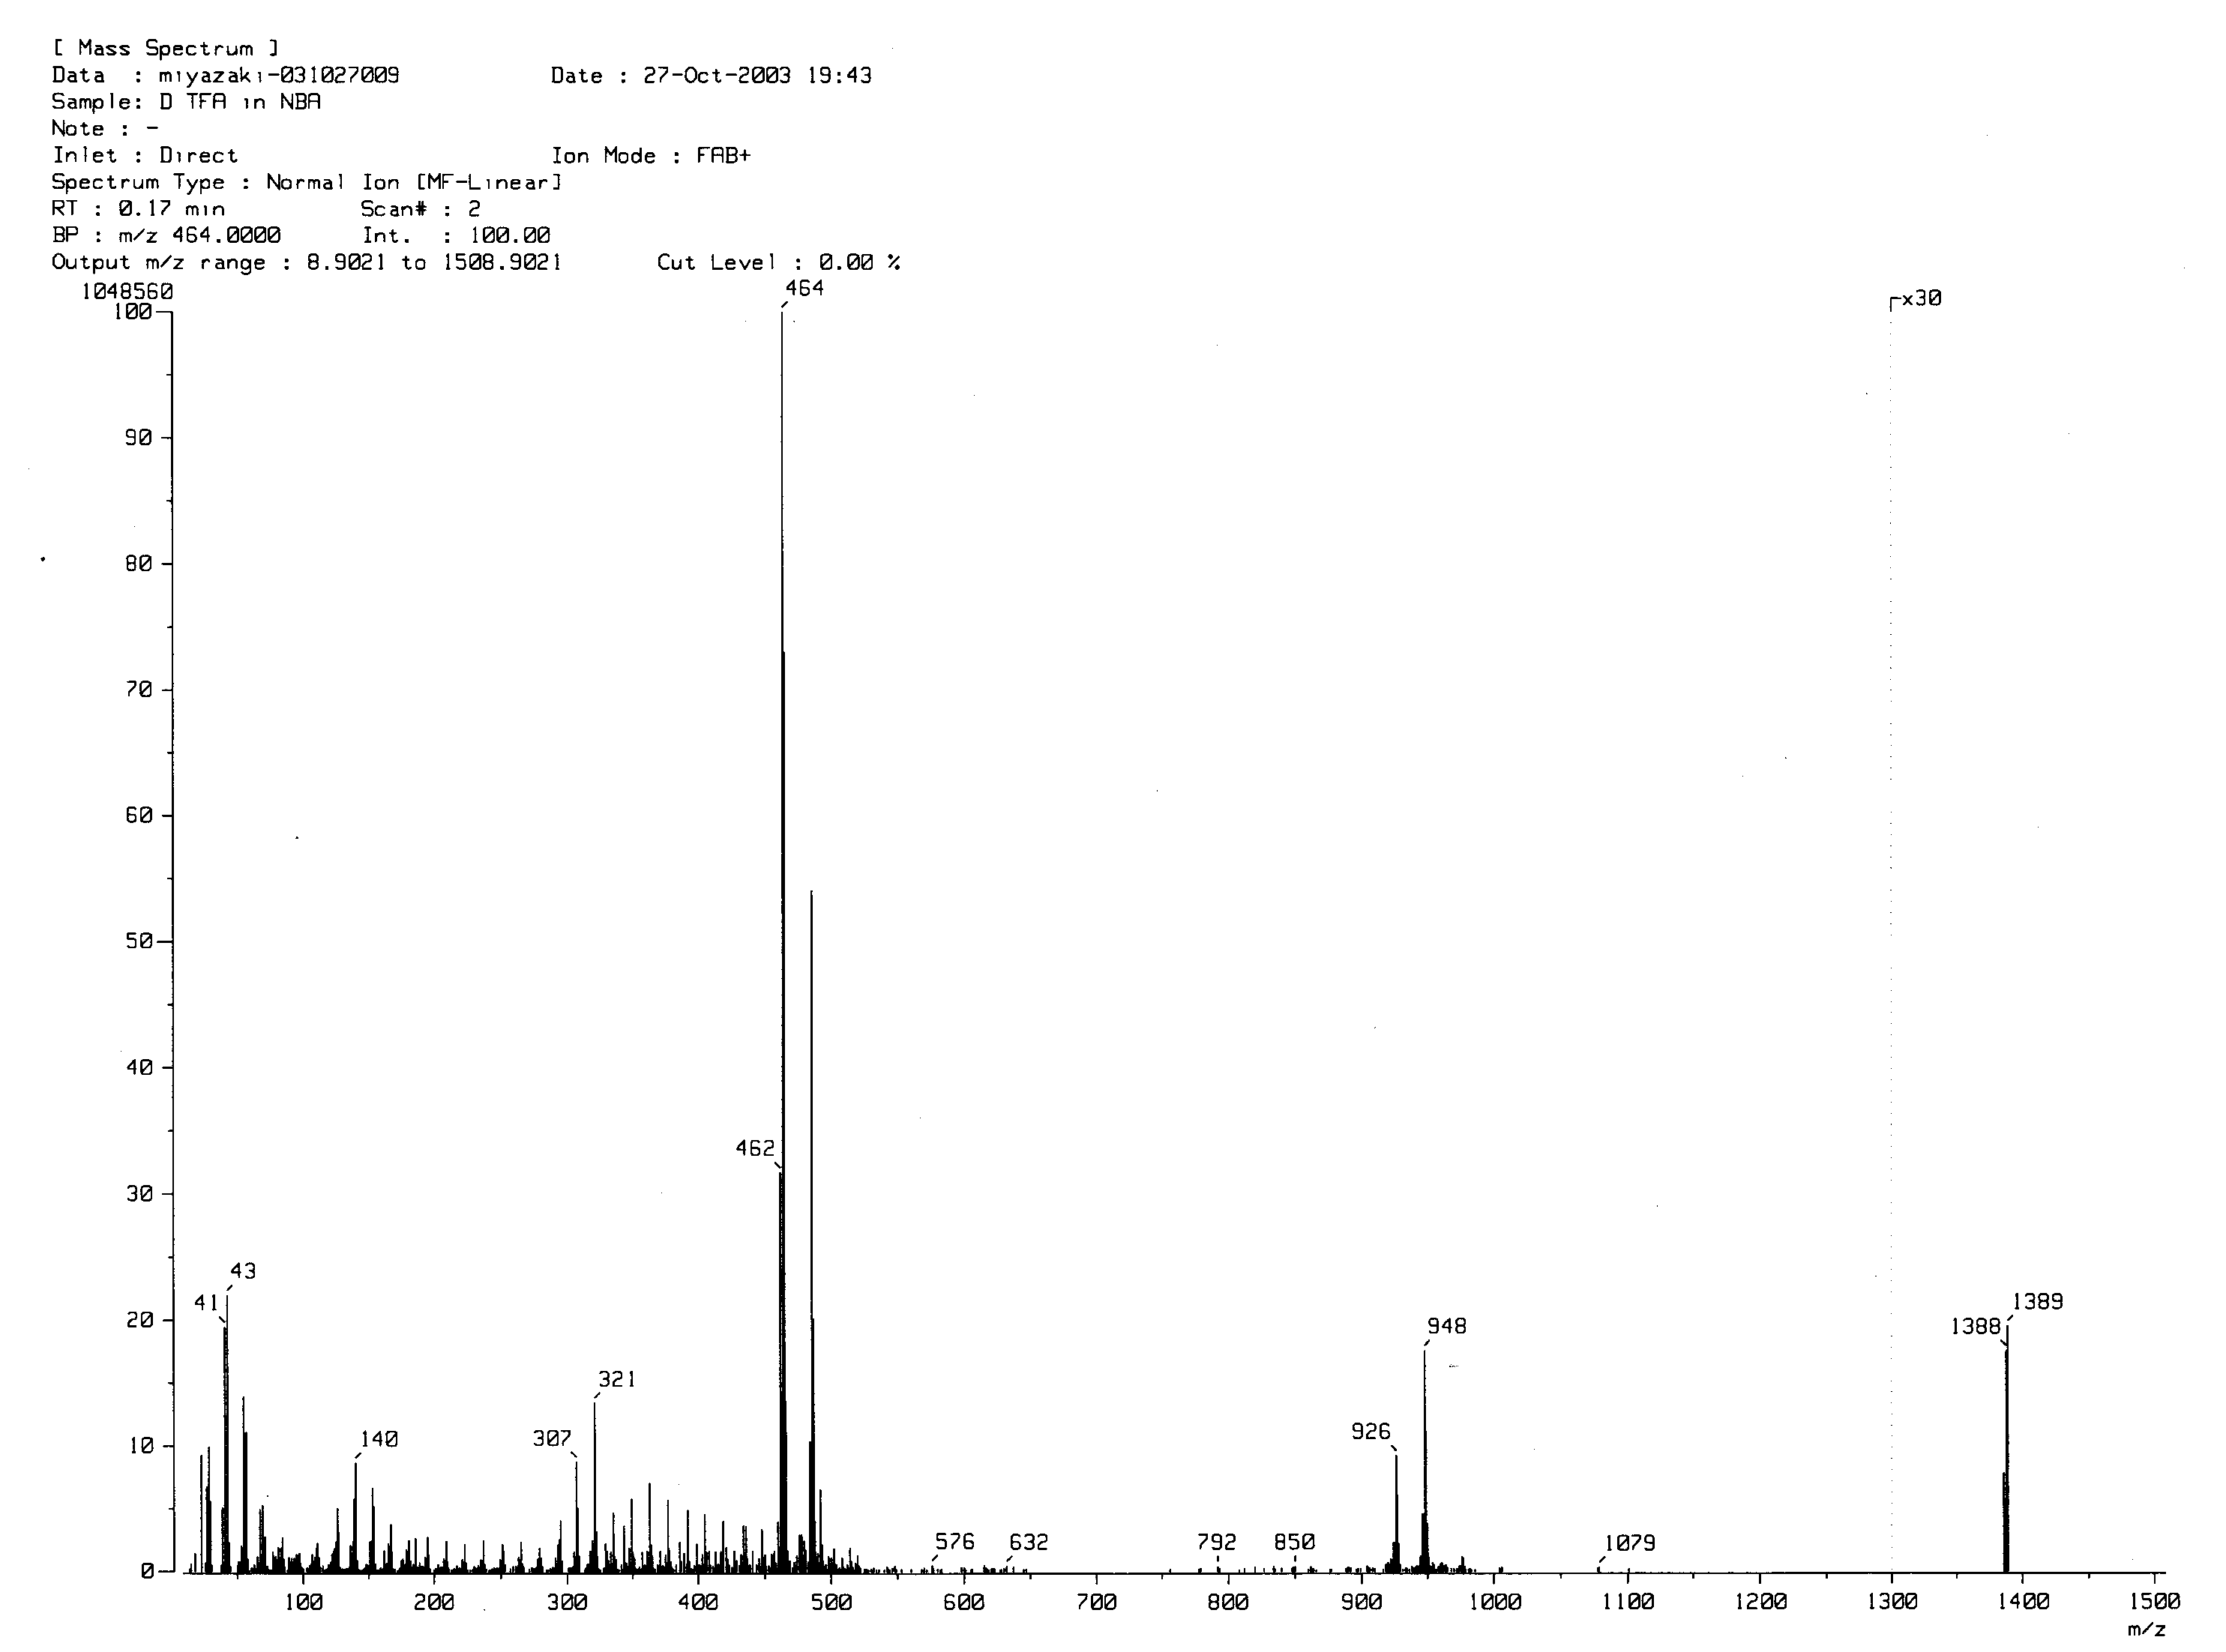

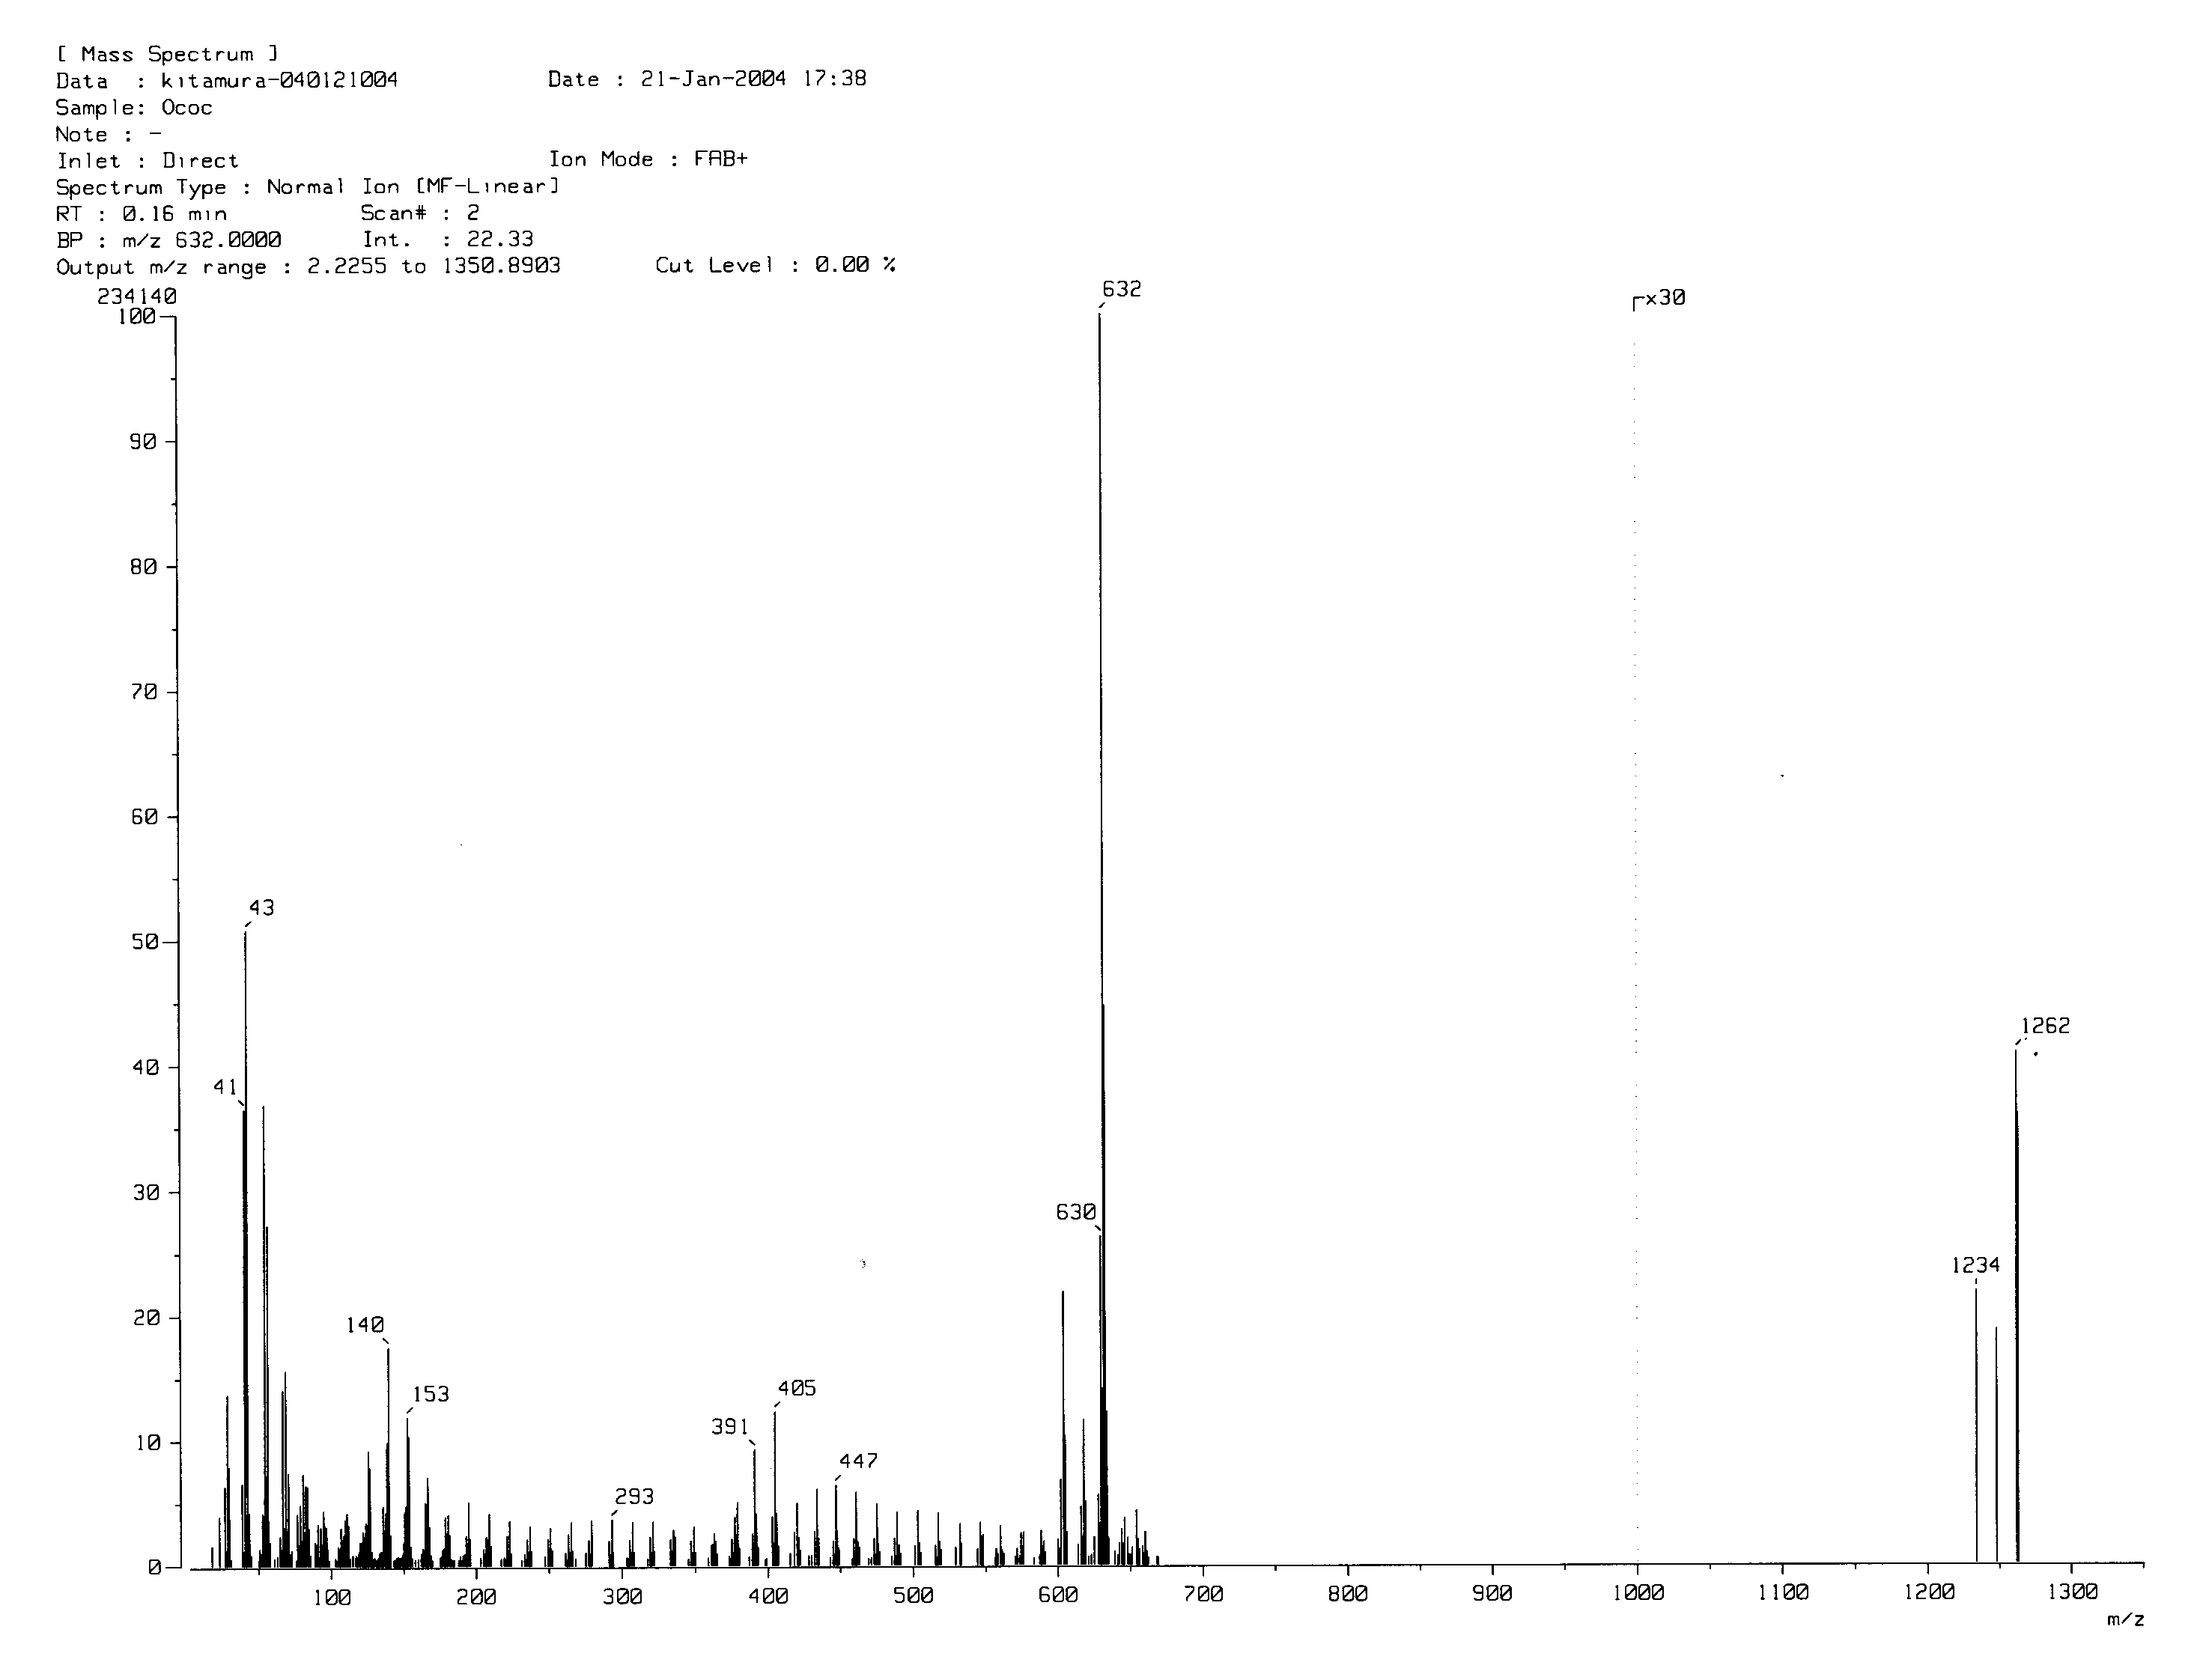
***

**3**, C28H54N4O, 463

M2H+

MH+

M3H+

**4**, C40H78N4O, 631

MH+

M2H+
